# Supplementary material for: Pregnancy complications among nulliparous and multiparous women with advanced maternal age: a community-based prospective cohort study in China
Source: Springer Nature journal article supplement (doi:10.1186/s12884-020-03284-1), 2020-10-02
Supplement: MOESM1 [file 18442262]

## Baseline questionnaire

### Basic information

1. Name \_\_\_\_\_ Ethnicity \_\_\_\_\_ Age \_\_\_\_\_ years
2. Residential type: a) Urban b) Rural
3. Average household income \_\_\_\_\_(Chinese Yuan)
4. Education level:
  - a) Primary school or lower
  - b) Junior high school
  - c) High school/vocational school
  - d) Collage/university
5. Occupation:
  - a) Farmer
  - b) Housewife
  - c) Work in the service industry/run a business/company employee
  - d) Factory worker
  - e) Others: \_\_\_\_\_
6. Pre-pregnancy height: \_\_\_\_\_ cm; pre-pregnancy weight: \_\_\_\_\_ kg

### Past obstetric history

1. Gravidity (number of times you have been pregnant, regardless of the outcome): \_\_\_\_\_ times  
Parity (total number of times you have given birth to a child with a gestational age of 24 weeks or more, regardless of whether the child was born alive or not): \_\_\_\_\_ times  
History of preterm labor: \_\_\_\_\_ times  
History of stillbirth: \_\_\_\_\_ times  
History of miscarriage: \_\_\_\_\_ times  
History of induced abortion: \_\_\_\_\_ times
2. Date of the last miscarriage: \_\_\_\_\_
3. Number of children alive: boys: \_\_\_\_\_; girls: \_\_\_\_\_  
Number of children with birth defects: \_\_\_\_\_
4. History of previous pregnancy complications: a) No b) Yes: \_\_\_\_\_
